# Supplementary material
Source: PubMed Central journal article supplement (PMC9930701)
Supplement: 41591_2023_2229_MOESM1_ESM.pdf [file 41591_2023_2229_MOESM1_ESM.pdf]

---

# Real-world effectiveness of a single dose of mpox vaccine in males

---

In the format provided by the authors and unedited

---

STROBE Statement—Checklist of items that should be included in reports of *cohort studies*

|                           | <b>Item<br/>No</b> | <b>Recommendation</b>                                                                                                                                                                | <b>Listed in Part/Page</b>                                                      |
|---------------------------|--------------------|--------------------------------------------------------------------------------------------------------------------------------------------------------------------------------------|---------------------------------------------------------------------------------|
| <b>Title and abstract</b> | 1                  | (a) Indicate the study’s design with a commonly used term in the title or the abstract                                                                                               | Abstract                                                                        |
|                           |                    | (b) Provide in the abstract an informative and balanced summary of what was done and what was found                                                                                  | Abstract                                                                        |
| <b>Introduction</b>       |                    |                                                                                                                                                                                      |                                                                                 |
| Background/rationale      | 2                  | Explain the scientific background and rationale for the investigation being reported                                                                                                 | Intro                                                                           |
| Objectives                | 3                  | State specific objectives, including any prespecified hypotheses                                                                                                                     | Intro                                                                           |
| <b>Methods</b>            |                    |                                                                                                                                                                                      |                                                                                 |
| Study design              | 4                  | Present key elements of study design early in the paper                                                                                                                              | Study Design and timeline section in Methods                                    |
| Setting                   | 5                  | Describe the setting, locations, and relevant dates, including periods of recruitment, exposure, follow-up, and data collection                                                      | Detailed in the Methods                                                         |
| Participants              | 6                  | (a) Give the eligibility criteria, and the sources and methods of selection of participants. Describe methods of follow-up                                                           | Study participants section in Methods                                           |
|                           |                    | (b) For matched studies, give matching criteria and number of exposed and unexposed                                                                                                  | Study participants section in Methods                                           |
| Variables                 | 7                  | Clearly define all outcomes, exposures, predictors, potential confounders, and effect modifiers. Give diagnostic criteria, if applicable                                             | Defined at the Study design and timeline section in the methods                 |
| Data sources/measurement  | 8*                 | For each variable of interest, give sources of data and details of methods of assessment (measurement). Describe comparability of assessment methods if there is more than one group | Defined in the data extraction and statistical analysis sections in the methods |
| Bias                      | 9                  | Describe any efforts to address potential sources of bias                                                                                                                            | Described in the limitations section                                            |
| Study size                | 10                 | Explain how the study size was arrived at                                                                                                                                            | Defined at the Study participants section in the methods                        |
| Quantitative variables    | 11                 | Explain how quantitative variables were handled in the analyses. If applicable, describe which groupings were chosen and why                                                         | Described in the statistical analysis section in the methods                    |
| Statistical methods       | 12                 | (a) Describe all statistical methods, including those used to control for confounding                                                                                                | Defined in the statistical analysis section                                     |
|                           |                    | (b) Describe any methods used to examine subgroups and interactions                                                                                                                  | There are no subgroup analyses in the study                                     |
|                           |                    | (c) Explain how missing data were addressed                                                                                                                                          | All data was available for the entire cohort                                    |
|                           |                    | (d) If applicable, explain how loss to follow-up was addressed                                                                                                                       | There was no loss for follow-up                                                 |
|                           |                    | (e) Describe any sensitivity analyses                                                                                                                                                | No sensitivity analysis was performed                                           |

| <b>Results</b>           |     |                                                                                                                                                                                                              |                                                                                                                          |
|--------------------------|-----|--------------------------------------------------------------------------------------------------------------------------------------------------------------------------------------------------------------|--------------------------------------------------------------------------------------------------------------------------|
| Participants             | 13* | (a) Report numbers of individuals at each stage of study—eg numbers potentially eligible, examined for eligibility, confirmed eligible, included in the study, completing follow-up, and analysed            | Reported in the Study Participants section                                                                               |
|                          |     | (b) Give reasons for non-participation at each stage                                                                                                                                                         | We include only vaccine-eligible individuals in the study, as reported in the Study Participants section in the results. |
|                          |     | (c) Consider use of a flow diagram                                                                                                                                                                           | We decided that it is redundant to include a figure                                                                      |
| Descriptive data         | 14* | (a) Give characteristics of study participants (eg demographic, clinical, social) and information on exposures and potential confounders                                                                     | Detailed in Table 1                                                                                                      |
|                          |     | (b) Indicate number of participants with missing data for each variable of interest                                                                                                                          | There is no missing data in the study                                                                                    |
|                          |     | (c) Summarise follow-up time (eg, average and total amount)                                                                                                                                                  | Reported in the Study Participants section                                                                               |
| Outcome data             | 15* | Report numbers of outcome events or summary measures over time                                                                                                                                               | Reported in the Assessment of vaccine effectiveness section                                                              |
| Main results             | 16  | (a) Give unadjusted estimates and, if applicable, confounder-adjusted estimates and their precision (eg, 95% confidence interval). Make clear which confounders were adjusted for and why they were included | Reported in Table 2                                                                                                      |
|                          |     | (b) Report category boundaries when continuous variables were categorized                                                                                                                                    | Not relevant                                                                                                             |
|                          |     | (c) If relevant, consider translating estimates of relative risk into absolute risk for a meaningful time period                                                                                             | Not relevant                                                                                                             |
| Other analyses           | 17  | Report other analyses done—eg analyses of subgroups and interactions, and sensitivity analyses                                                                                                               | Not applicable                                                                                                           |
| <b>Discussion</b>        |     |                                                                                                                                                                                                              |                                                                                                                          |
| Key results              | 18  | Summarise key results with reference to study objectives                                                                                                                                                     | Reported in the results section                                                                                          |
| Limitations              | 19  | Discuss limitations of the study, taking into account sources of potential bias or imprecision. Discuss both direction and magnitude of any potential bias                                                   | Discussed in the limitations                                                                                             |
| Interpretation           | 20  | Give a cautious overall interpretation of results considering objectives, limitations, multiplicity of analyses, results from similar studies, and other relevant evidence                                   | Elaborated in the discussion                                                                                             |
| Generalisability         | 21  | Discuss the generalisability (external validity) of the study results                                                                                                                                        | Elaborated in the discussion                                                                                             |
| <b>Other information</b> |     |                                                                                                                                                                                                              |                                                                                                                          |
| Funding                  | 22  | Give the source of funding and the role of the funders for the present study                                                                                                                                 | No funding                                                                                                               |
